# Supplementary material
Source: PubMed Central journal article supplement (PMC2765079)
Supplement: 0905703106_0905703106SI.pdf [file 0905703106_0905703106SI.pdf]

# Supporting Information

DeZwaan and Freeman 10.1073/pnas.0905703106

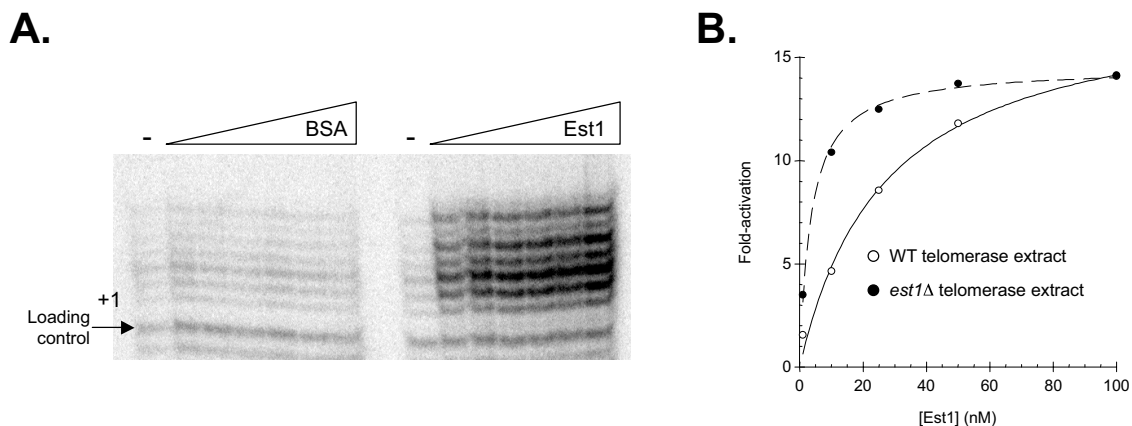

**Fig. S1.** Purified Est1 enhances telomerase DNA extension activity in vitro. (A) The Est1 effect on telomerase-mediated DNA extension was tested using an immobilized DNA substrate with a 7-base 3'-overhang and telomerase extract prepared from wild type yeast. The DNA extension reactions were supplemented with BSA or Est1 (1, 5, 10, 25, 50, 75, and 100 nM), as indicated. To serve as a loading control an end-labeled 27-base primer was added before the precipitation of the telomerase extension products. All extension products were resolved by denaturing polyacrylamide electrophoresis. The positions of the loading control and + 1 DNA extension product are marked. (B) The relative affinity between Est1 and telomerase produced in either wild type or *est1*Δ yeast was determined by fitting a curve to the average fold-activation vs. common Est1 protein concentration points, as shown. The *R* value for both curve fits is 0.99.



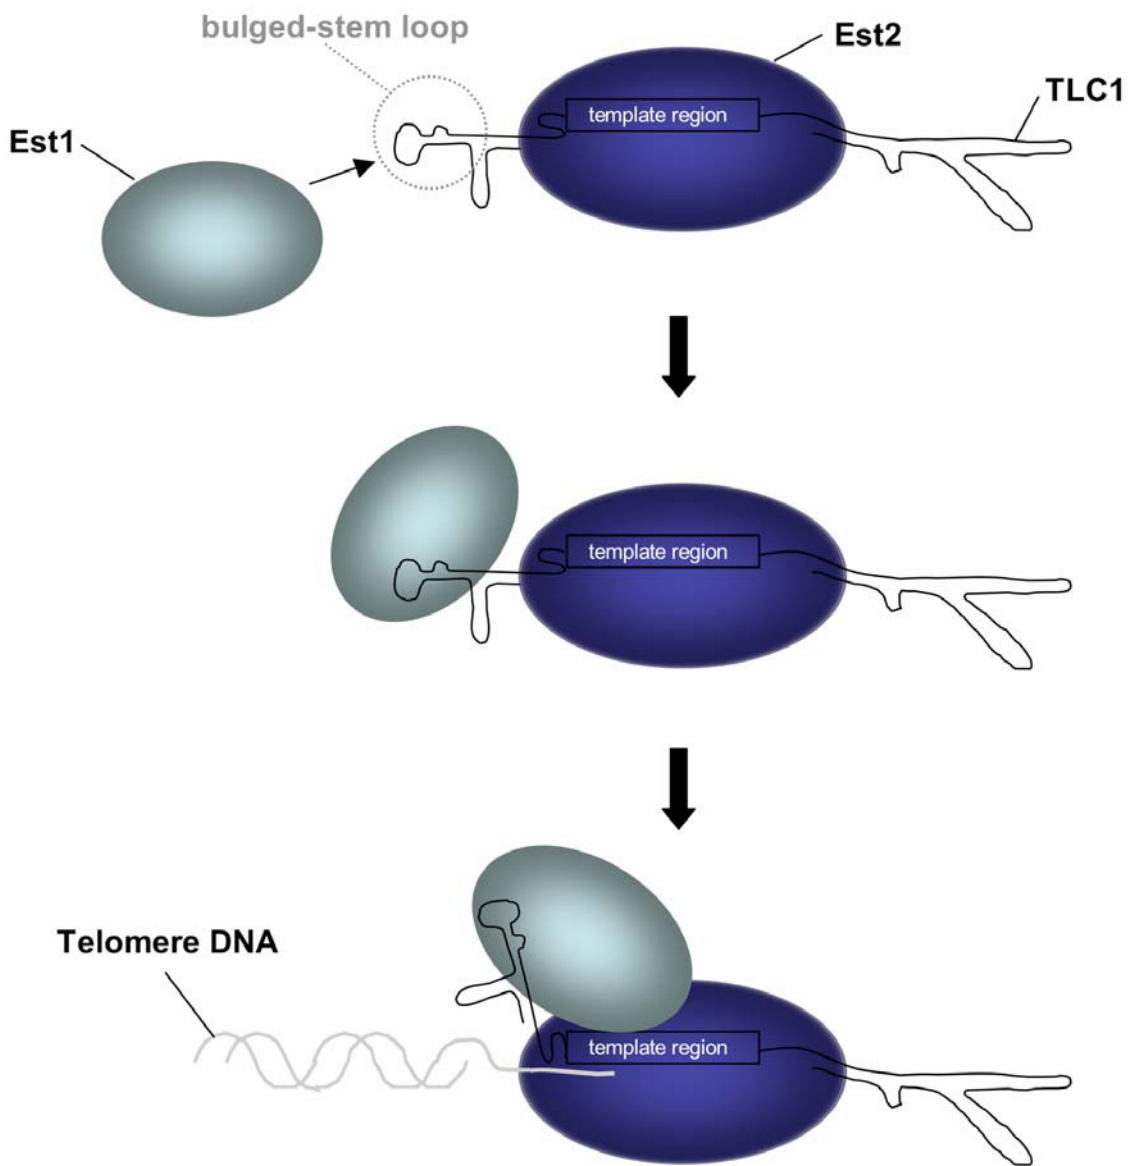

**Fig. S3.** Est1 stimulation of telomerase enzymatic activity is critical for proper telomere DNA lengthening. Before telomere-association the telomerase holoenzyme assembles with a telomere through Est1 and the TLC1 RNA interactions. Once telomere-bound, Est1 activates telomerase by way of direct contacts with the Est2 reverse transcriptase subunit.



**Table S1. Summary of quantified data**

| Protein | RNA EMSA, % | DNA EMSA, % | Telomerase extension, % |
|---------|-------------|-------------|-------------------------|
| WT Est1 | 100         | 100         | 100                     |
| Est1-38 | 30 ± 5      | 25 ± 9      | 93 ± 4                  |
| Est1-41 | 104 ± 3     | 85 ± 2      | 38 ± 4                  |
| Est1-42 | 62 ± 2      | 80 ± 8      | 110 ± 0                 |
| Est1-49 | 39 ± 6      | 70 ± 3      | 100 ± 1                 |
| Est1-50 | 30 ± 2      | 43 ± 6      | 104 ± 2                 |
| Est1-60 | 91 ± 1      | 87 ± 6      | 34 ± 3                  |
